# Supplementary material
Source: PubMed Central journal article supplement (PMC2585998)
Supplement: NIHMS65488-supplement-01.pdf [file NIHMS65488-supplement-01.pdf]

## Supplemental Data

### ATP-Driven Self-Assembly

### of a Morphogenetic Protein in *Bacillus subtilis*

Kumaran S. Ramamurthi and Richard Losick

**Table S1.** Sporulation efficiencies of strains harboring various *IVA* alleles

| Strain <sup>a</sup> | <i>IVA</i> | <i>thr</i>                 | Sporulation efficiency <sup>b</sup> |
|---------------------|------------|----------------------------|-------------------------------------|
| A                   | WT         | -                          | 1                                   |
| B                   | Δ          | -                          | <10 <sup>-8</sup>                   |
| C                   | Δ          | <i>IVA</i> <sup>WT</sup>   | 0.97                                |
| D                   | Δ          | <i>IVA</i> <sup>K30A</sup> | 0.05                                |
| E                   | Δ          | <i>IVA</i> <sup>K30E</sup> | 1.1 X 10 <sup>-8</sup>              |
| F                   | WT         | <i>IVA</i> <sup>WT</sup>   | 0.68                                |
| G                   | WT         | <i>IVA</i> <sup>K30A</sup> | 0.50                                |
| H                   | WT         | <i>IVA</i> <sup>K30E</sup> | 0.41                                |

<sup>a</sup>Strain A: PY79; B: KP73; C: KR394; D: KR367; E: KR438; F: KR217; G: KR374; H: KR445. Genotypes are listed in Table S2.

<sup>b</sup>Spores/ml recovered, relative to PY79 (WT). PY79 routinely yields 3-4 X 10<sup>8</sup> spores/ml.

**Table S2.** Strains used in this study.

| Strain  | Genotype                                                                                               | Reference/Source              |
|---------|--------------------------------------------------------------------------------------------------------|-------------------------------|
| PY79    | Prototrophic derivative of <i>B. subtilis</i> 168                                                      | Youngman <i>et al.</i> (1984) |
| CW271   | <i>cotE::pCW13 (cotE-gfp) cat</i>                                                                      | Webb <i>et al.</i> (1995)     |
| KP73    | $\Delta spoIVA::neo$                                                                                   | Price and Losick (1999)       |
| CVO1195 | <i>amyE::spoVM-gfp cat</i>                                                                             | van Ooij and Losick (2003)    |
| MF339   | <i>amyE::PspacC-gfp spec</i>                                                                           | Branda <i>et al.</i> (2001)   |
| KR160   | <i>thrC::gfp-spoIVA spec</i>                                                                           | Ramamurthi and Losick (2006)  |
| KR119   | $\Delta spoVM::tet \Delta spoIVA::neo$<br><i>amyE::spoVM-gfp cat</i>                                   |                               |
| KR219   | $\Delta spoVM::tet \Delta spoIVA::neo$<br><i>amyE::spoVM-gfp cat thrC::spoIVA spec</i>                 |                               |
| KR217   | <i>thrC::spoIVA spec</i>                                                                               |                               |
| KR367   | <i>spoIVA::neo thrC::spoIVA(K30A) spec</i>                                                             |                               |
| KR374   | <i>thrC::spoIVA(K30A) spec</i>                                                                         |                               |
| KR391   | <i>thrC::gfp-spoIVA(K30A) spec</i>                                                                     |                               |
| KR394   | $\Delta spoIVA::neo thrC::spoIVA spec$                                                                 |                               |
| KR438   | $\Delta spoIVA::neo thrC::spoIVA(K30E) spec$                                                           |                               |
| KR444   | $\Delta spoVM::tet \Delta spoIVA::neo$<br><i>amyE::spoVM-gfp cat</i><br><i>thrC::spoIVA(K30E) spec</i> |                               |
| KR445   | <i>thrC::spoIVA(K30E) spec</i>                                                                         |                               |
| KR446   | <i>thrC::gfp-spoIVA(K30E) spec</i>                                                                     |                               |
| KR448   | $\Delta spoIVA::neo thrC::spoIVA spec$<br><i>cotE::pCW13 (cotE-gfp) cat</i>                            |                               |
| KR449   | $\Delta spoIVA::neo thrC::spoIVA(K30E) spec$<br><i>cotE::pCW13 (cotE-gfp) cat</i>                      |                               |
| KR455   | $\Delta spoIVA::neo cotE::pCW13 (cotE-gfp) cat$                                                        |                               |
| KR466   | $\Delta spoIVA::neo amyE::His6-spoIVA cat$<br><i>thrC::FLAG-spoIVA spec</i>                            |                               |
| KR481   | $\Delta spoIVA::neo amyE::His6-spoIVA(K30E) cat$<br><i>thrC::FLAG-spoIVA(K30E) spec</i>                |                               |
